# Supplementary material for: CDK4/6 Inhibition Induces CD8+ T Cell Antitumor Immunity via MIF-Induced Functional Orchestration of Tumor-Associated Macrophages
Source: Research Square preprint supplement (doi:10.21203/rs.3.rs-5235555/v1), 2024-11-07
Supplement: Supplementary file 1 [file 6d316f0957b2000a84c201f2.xlsx]

## Sheet: Sheet1
No.	gender	age	TNM stage	location	Surgery	Molecular Phenotype
UH2023061201	F	68	pT1aN0M0	Left	mastectomy	TNBC
UH2023091601	F	37	pT1N0M0	Right	mastectomy	Luminal-HER2-
