# Supplementary material for: CDK4/6 Inhibition Induces CD8+ T Cell Antitumor Immunity via MIF-Induced Functional Orchestration of Tumor-Associated Macrophages
Source: Research Square preprint supplement (doi:10.21203/rs.3.rs-5235555/v1), 2024-11-07
Supplement: Supplementary file 1 [file a03e2b57ed24777afce53a18.pdf]

# CDK4/6 Inhibition Induces CD8<sup>+</sup> T Cell Antitumor Immunity via MIF-Induced Functional Orchestration of Tumor-Associated Macrophages

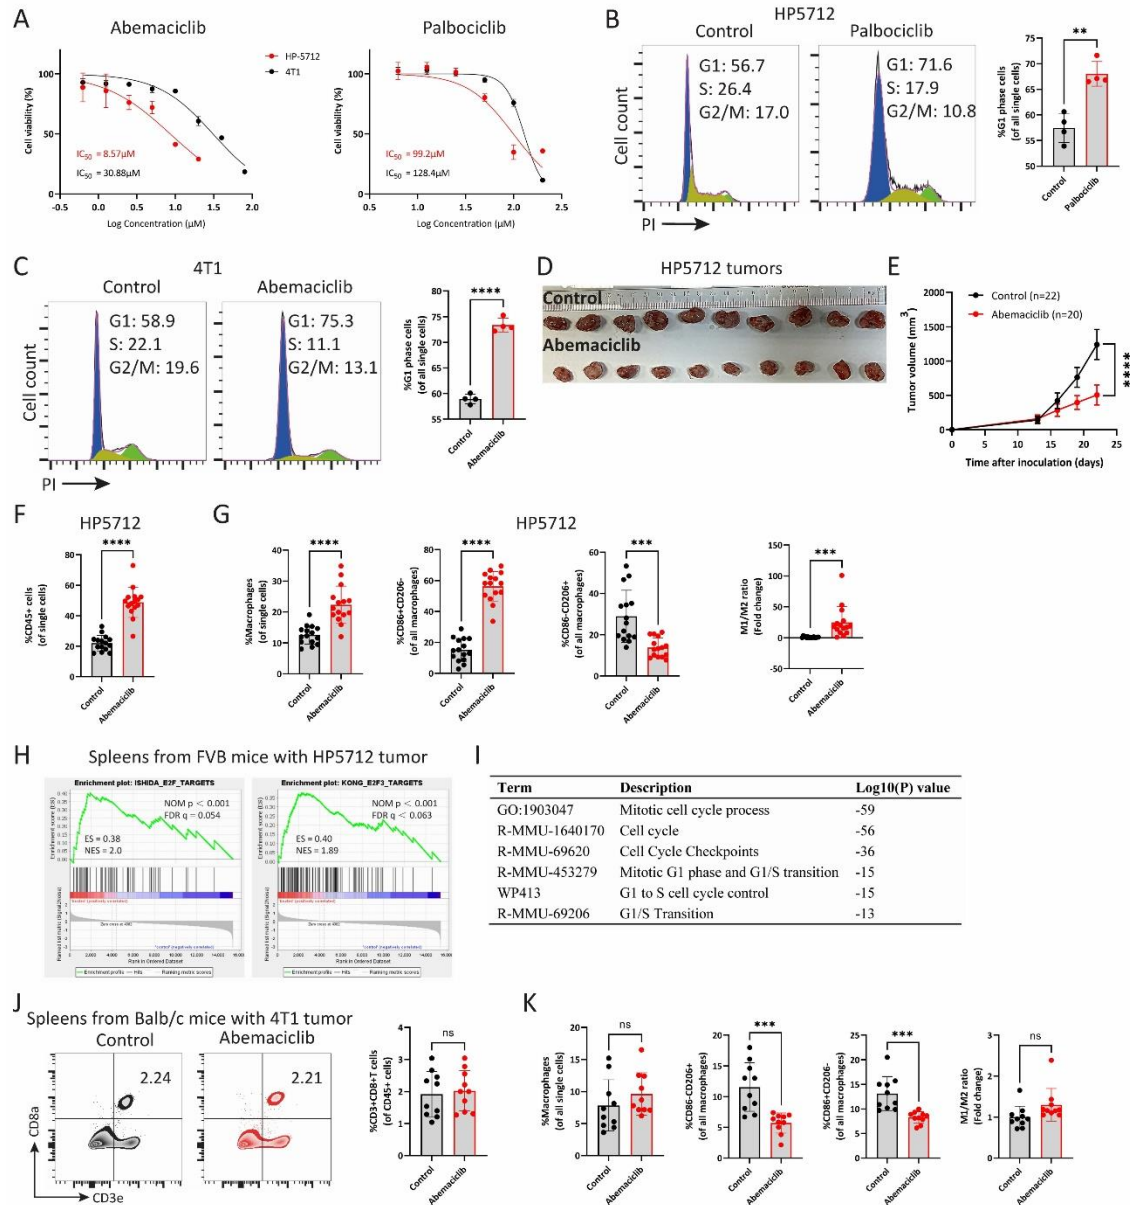

**Supplementary Figure 1. CDK4/6 inhibition creates an immunostimulatory status in the tumor microenvironment but not in the circulatory system.**

A. IC<sub>50</sub> of CDK4/6 inhibitors, Abemaciclib (left) and Palbociclib (right), in HP5712 and 4T1 cell lines.

B-C. Representative FACS cell cycle distribution and comparison of G1 phase cell populations of HP5712 (B) and 4T1 (C) cells after control or Abemaciclib treatment (n=4, respectively).

D. Representative tumor images of FVB mice orthotopically injected with HP5712 cells after 10 days of control or Abemaciclib treatment (n=10, respectively).

E. Tumor volume changes of FVB mice orthotopically injected with HP5712 cells after 10 days of control or Abemaciclib treatment (control, n=22; Abemaciclib, n=20).

F. Intratumoral lymphocytes from FVB mice orthotopically injected with HP5712 cells after 10 days of control or Abemaciclib treatment.

G. Intratumoral macrophages, M1 phenotypes, M2 phenotypes, and fold changes of M1/M2 ratio in FVB mice orthotopically injected with HP5712 cells after 10 days of control or Abemaciclib treatment (n=15, respectively).

H-I. GSEA terms (H) and GO terms (I) significantly upregulated by Abemaciclib compared to control in spleens from FVB mice orthotopically injected with HP5712 cells (n=3, respectively).

J. Representative FACS plot and quantifications of CD8<sup>+</sup> T cells in spleens from Balb/c mice orthotopically injected with 4T1 cells after 10 days of control or Abemaciclib treatment (n=10, respectively).

K. Intratumoral macrophages, M1 phenotypes, M2 phenotypes, and fold changes of M1/M2 ratio in spleens from Balb/c mice orthotopically injected with 4T1 cells after 10 days of control or Abemaciclib treatment (n=10, respectively).

Unpaired two-tailed t-tests (B, C, E-G, J, K). Error bars represent SD. ns  $p > 0.05$ , \*\* $p < 0.01$ , \*\*\* $p < 0.001$ , \*\*\*\* $p < 0.0001$ .

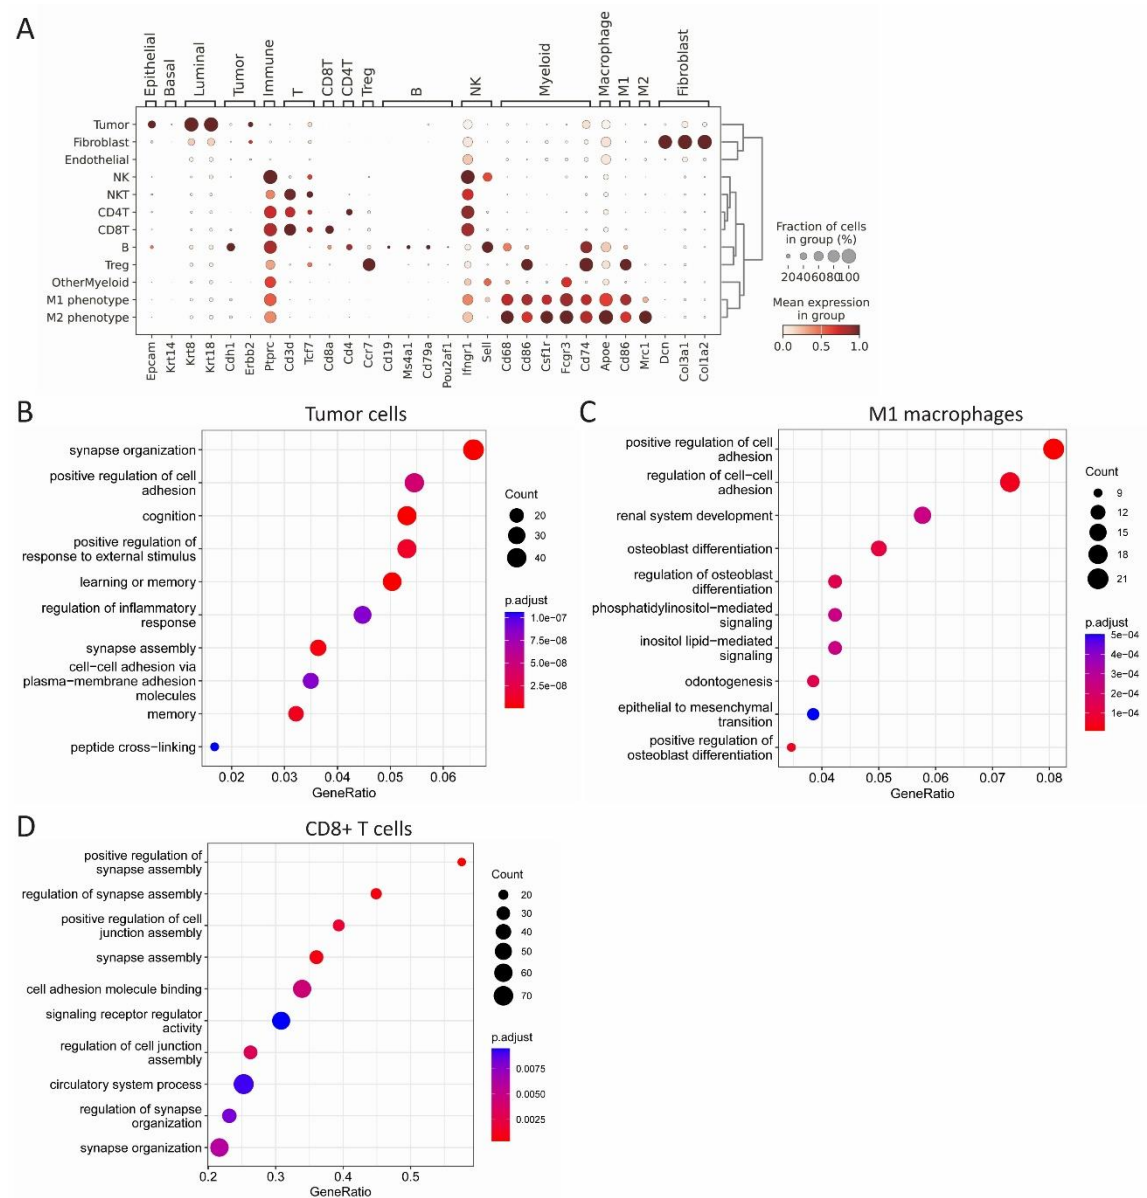

**Supplementary Figure 2. Cell type annotation for scRNA-seq of Balb/c mice orthotopically implanted 4T1 tumors after control or Abemaciclib treatment.**

A. Cell type annotation for scRNA-seq of tumors.

B-D. GO terms of Abemaciclib-upregulated genes in tumor cells (B), M1 macrophages (C), and CD8+ T cells (D) compared to control.

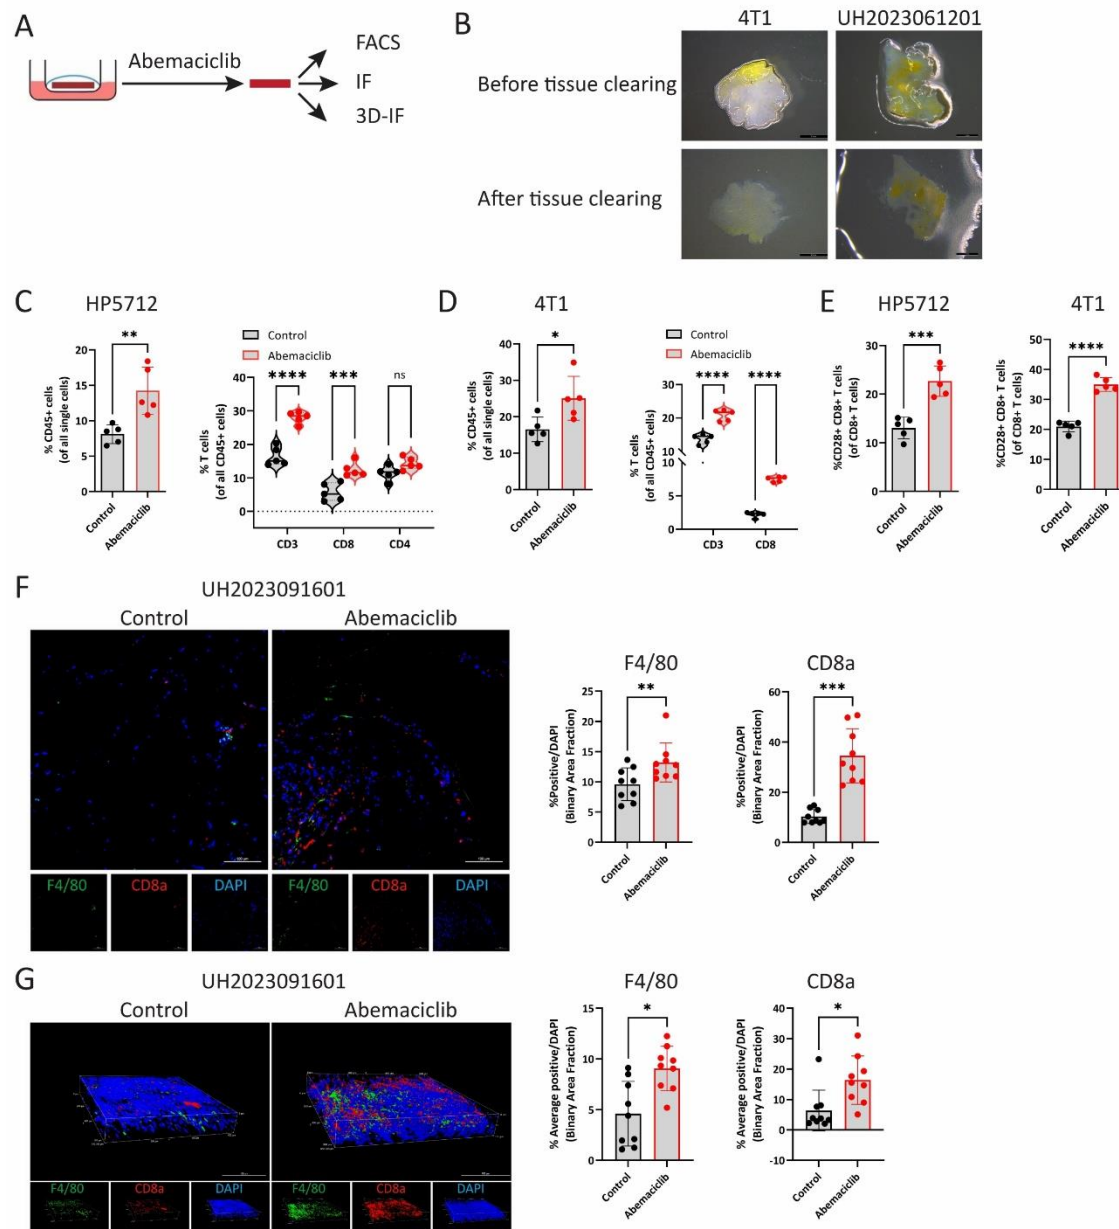

**Supplementary Figure 3. CDK4/6 inhibition increases intratumoral CD8+ T cells and macrophages ex vivo.**

A. Workflow of assessing the tumor immune cell changes of tumor slices after Abemaciclib treatment.

B. Representative images of murine and human tumor slices before and after tissue clearing; scale bar = 2 mm.

C-D. Intratumoral lymphocytes and T cell subpopulations in immunocompetent mice orthotopically injected with HP5712 tumor slices (C) or 4T1 tumor slices (D) after 5 days of control or Abemaciclib ex vivo treatment (n=5, respectively).

E. CD28 expression on CD8+ T cells in immunocompetent mice orthotopically injected with HP5712 (left) or 4T1 (right) tumor slices after 5 days of control or Abemaciclib treatment (n=5, respectively).

F-G. Representative IF images and quantifications (F; 3 areas × 3 samples, respectively) and 3D-IF images and quantifications (G; 3 areas × 3 samples, respectively) of F4/80 (green) and

CD8a (red) expressions on human Luminal breast tumor slices after 5 days of control or Abemaciclib treatment; scale bar = 100  $\mu$ m.

Unpaired two-tailed t-tests (C-G), two-way ANOVA corrected for multiple comparisons (C, D). Error bars represent SD. \* $p < 0.05$ , \*\* $p < 0.01$ , \*\*\* $p < 0.001$ , \*\*\*\* $p < 0.0001$ .

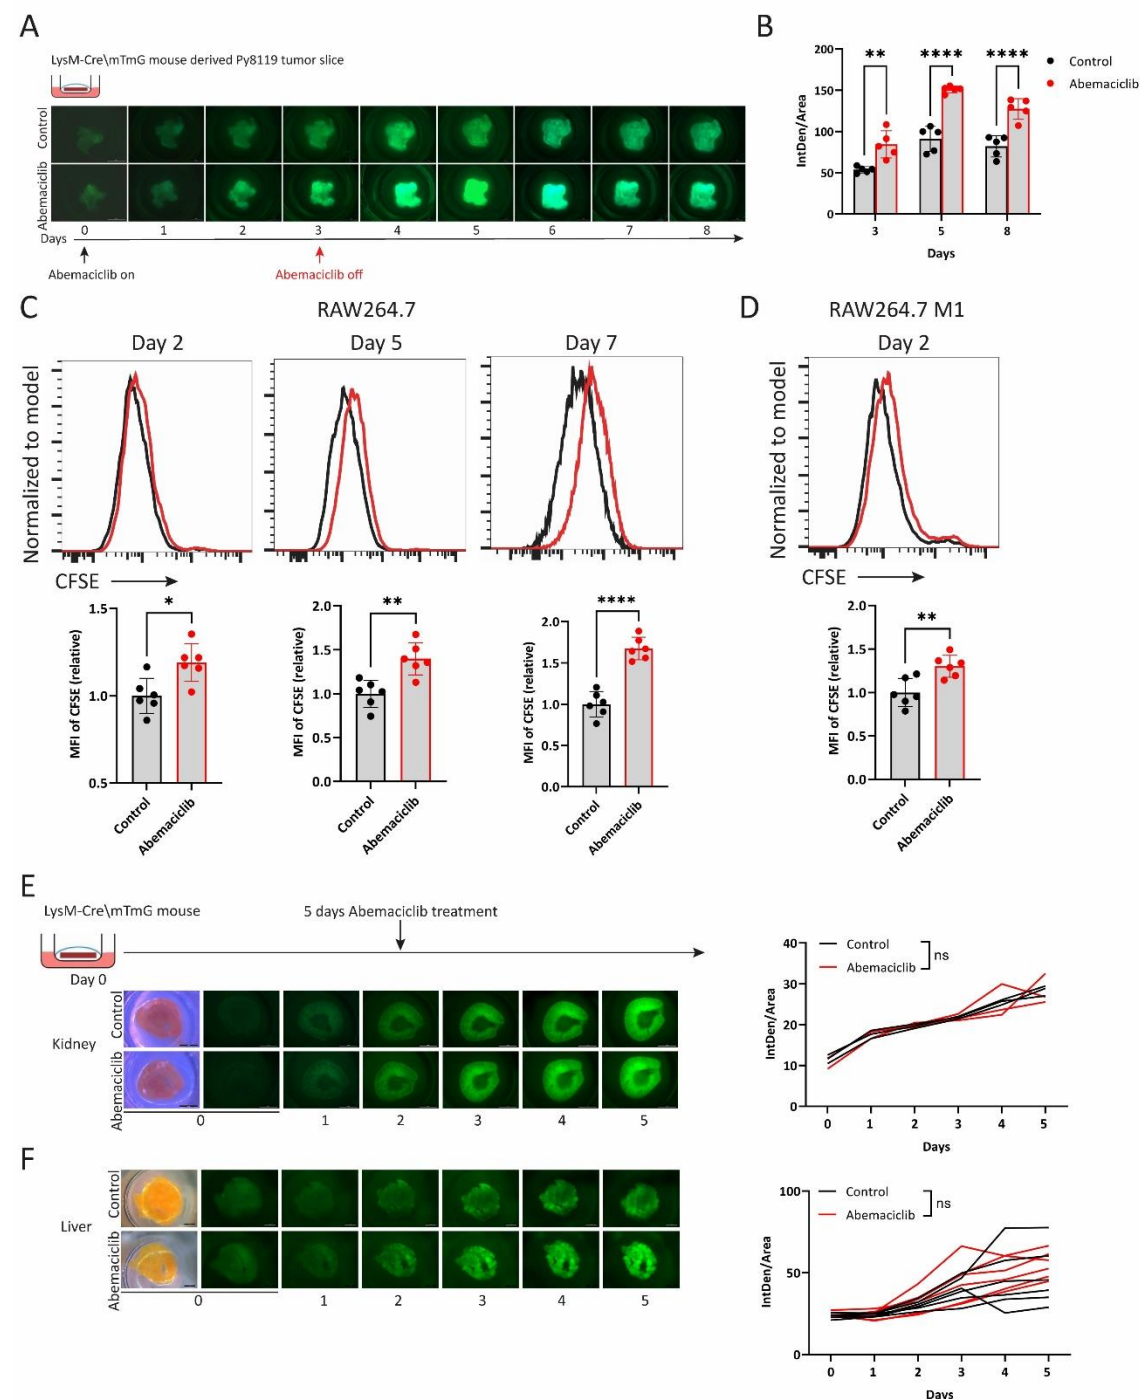

**Supplementary Figure 4. CDK4/6 inhibition induces immune-like macrophage memory in a tumor-dependent manner.**

A-B. Representative image (A) and intensity quantification at different days (B) of LysM-Cre<sup>+</sup>/mTmG mice orthotopically injected with Py8119 tumor slices by control or Abemaciclib treatment (n=5, respectively); scale bar = 2 mm.



C. Representative FACS histograms and quantifications of CFSE expression on the surface of RAW264.7 macrophages after 2, 5, and 7 days of control or Abemaciclib treatment (n=6, respectively).

D. Representative FACS histograms and quantifications of CFSE expression on the surface of RAW264.7 (M1) macrophages after 2 days of control or Abemaciclib treatment (n=6, respectively).

E-F. Representative images and dynamic GFP signal intensity changes of LysM-Cre<sup>+</sup>mTmG tumor-free mice-derived kidney (E; n=5, respectively) and liver (F; n=5, respectively) slices after 5 days of control or Abemaciclib treatment; scale bar = 2 mm.

Unpaired two-tailed t-tests (C-F); two-way ANOVA corrected for multiple comparisons (B). Error bars represent SD. ns  $p > 0.05$ , \* $p < 0.05$ , \*\*\*\* $p < 0.0001$ .

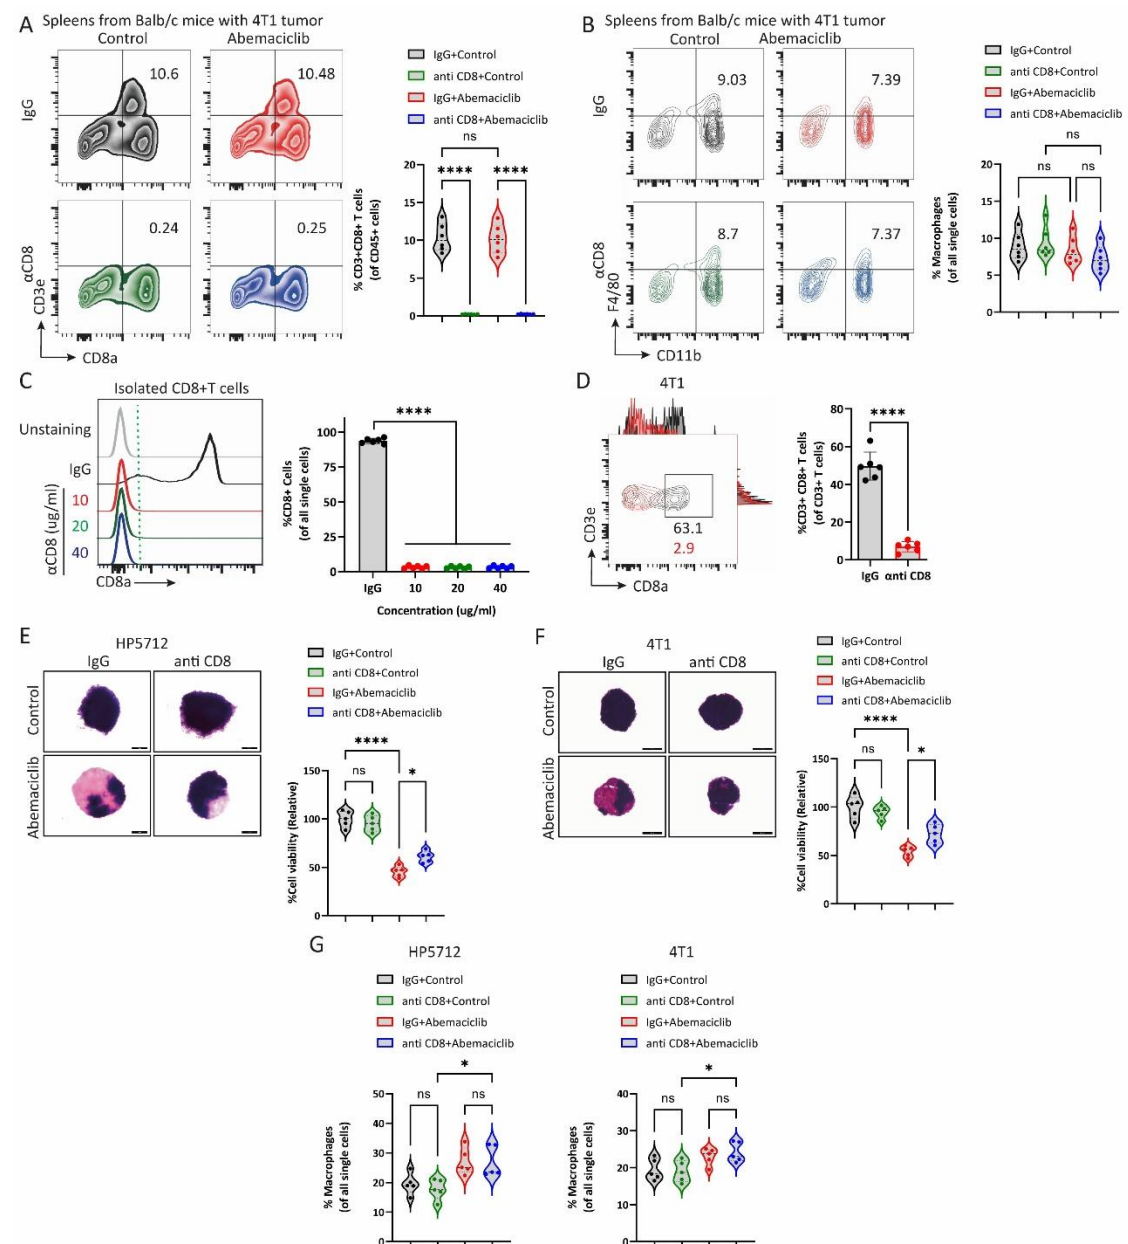

**Supplementary Figure 5. CDK4/6 inhibition expands intratumoral macrophages ex vivo independent of CD8<sup>+</sup> T cells.**

A-B. Representative FACS plot and quantifications of CD8<sup>+</sup> T cells (A) and macrophages (B) in spleens from Balb/c mice orthotopically injected with 4T1 cells after IgG or anti-CD8 depletion plus control or Abemaciclib treatment (n=6, respectively).

C. CD8a expression on FVB mice-derived naïve CD8<sup>+</sup> T cells after IgG or gradient concentration of anti-CD8 depletion treatment (n=6, respectively).

D. Representative FACS plot and quantifications of CD8<sup>+</sup> T cells in immunocompetent mice orthotopically injected with 4T1 tumor slices after IgG or anti-CD8 depletion ex vivo treatment (n=6, respectively).

E-F. Representative MTT images and quantification of cell viability in immunocompetent mice orthotopically injected with HP5712 (E; n=5, respectively) and 4T1 (F; n=5, respectively) after pre-IgG or pre-anti-CD8 plus control or Abemaciclib ex vivo treatment.

G. Intratumoral macrophages in immunocompetent mice orthotopically injected with HP5712 (left) and 4T1 (right) tumor slices after pre-IgG or pre-anti-CD8 plus control or Abemaciclib ex vivo treatment (n=5, respectively).

Unpaired two-tailed t-tests (D), one-way ANOVA corrected for multiple comparisons (A-C, E-G). Error bars represent SD. ns  $p > 0.05$ , \* $p < 0.05$ , \*\* $p < 0.01$ , \*\*\* $p < 0.001$ , \*\*\*\* $p < 0.0001$ .

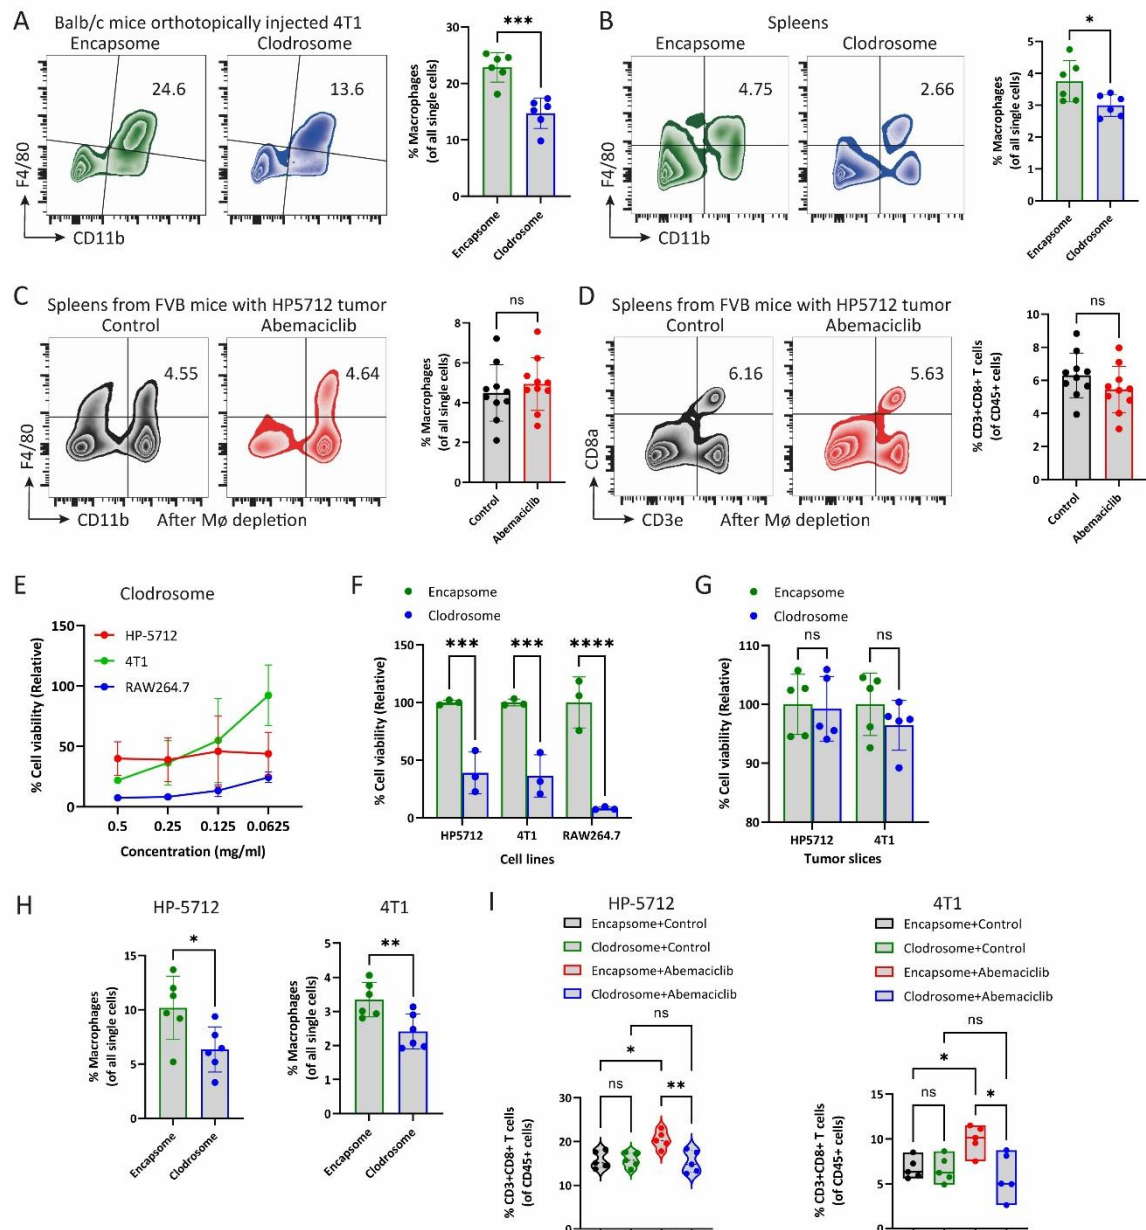

**Supplementary Figure 6. CDK4/6 inhibition fails to expand intratumoral CD8+ T cells after macrophage depletion ex vivo.**

A-B. Macrophage removal efficiency of Clodrosome in tumors (A) and spleens (B) from Balb/c mice orthotopically injected with 4T1 cells (n=6, respectively).

C-D. Representative FACS plot and quantifications of macrophages (C) and CD8+ T cells (D) in spleens from FVB mice orthotopically injected with HP5712 cells after Clodrosome plus control or Abemaciclib treatment (n=10, respectively).

E. Cell viability of cancer cells and macrophages after gradient concentration of Encapsome or Clodrosome treatment (n=3, respectively).

F-G. Cell viability of cell lines (F; n=3, respectively) and immunocompetent mice orthotopically injected with tumor slices (G; n=5, respectively) after 0.25 mg/ml Encapsome or Clodrosome treatment.



H. Intratumoral macrophages in immunocompetent mice orthotopically implanted with HP5712 (left) and 4T1 (right) tumor slices after Encapsome or Clodrosome treatment (n=6, respectively).

I. Intratumoral CD8<sup>+</sup> T cells from immunocompetent mice orthotopically implanted with HP5712 (left) and 4T1 (right) tumor slices after Encapsome or Clodrosome pretreatment plus control or Abemaciclib treatment (n=5, respectively).

Unpaired two-tailed t-tests (A-D, H), one-way ANOVA corrected for multiple comparisons (I), two-way ANOVA corrected for multiple comparisons (F, G). Error bars represent SD. ns  $p > 0.05$ , \* $p < 0.05$ , \*\* $p < 0.01$ , \*\*\* $p < 0.001$ , \*\*\*\* $p < 0.0001$ .

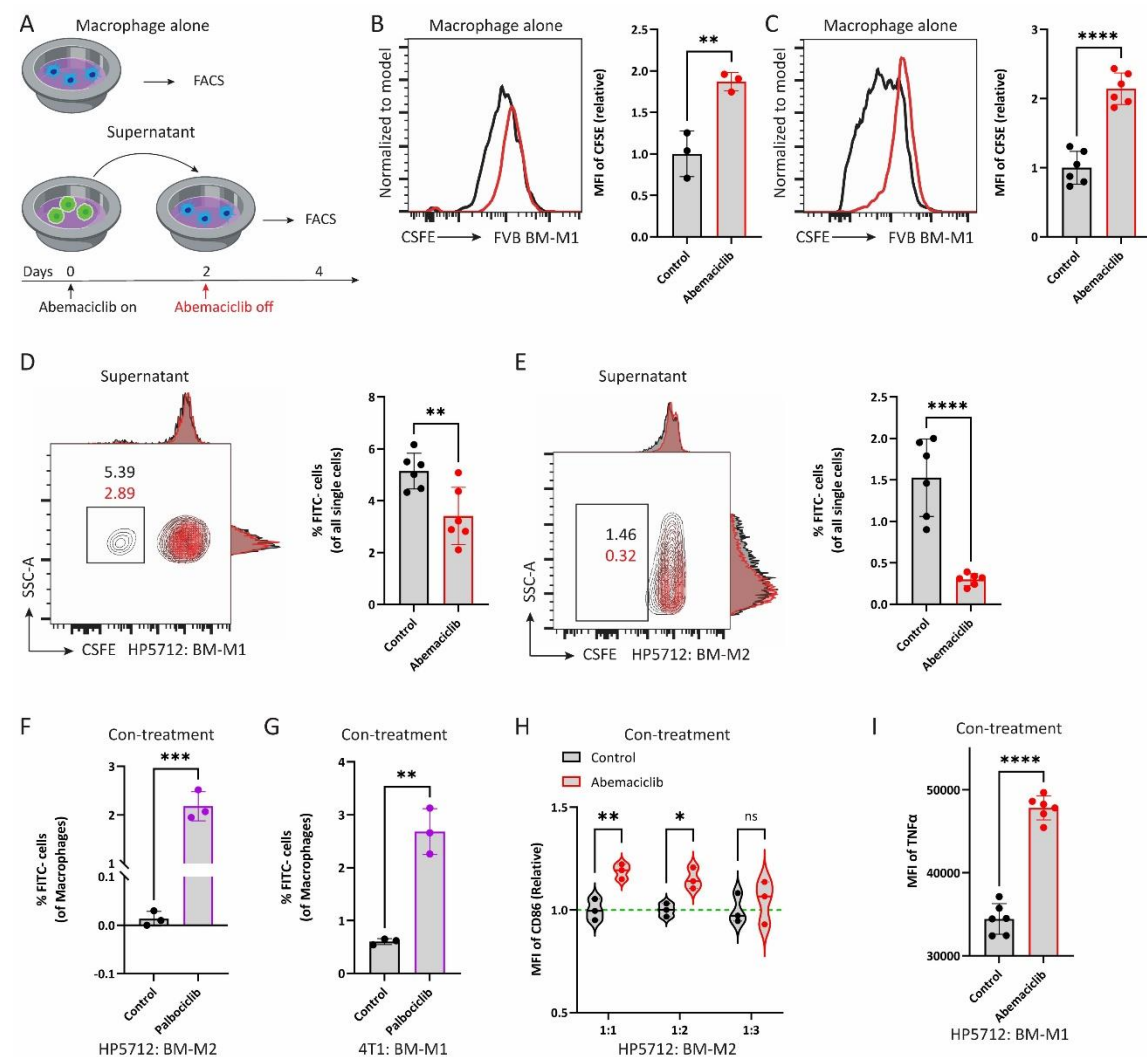

**Supplementary Figure 7. CDK4/6 inhibition increases macrophage proliferation and activation and polarizes M2 to M1 macrophages dependent on the tumor microenvironment.**

A. Macrophage alone or the supernatant model to detect macrophage proliferation and activation potential.

B-C. Representative FACS histograms and quantifications of the proliferation potential of FVB mice BM-M1 macrophages (B; n=3, respectively) or BM-M2 macrophages (C; n=6, respectively) alone after control or Abemaciclib treatment.

D-E. Representative FACS plots and quantifications of the proliferation potential of FVB mice BM-M1 macrophages (D; n=6, respectively) or BM-M2 macrophages (E; n=6, respectively) in the supernatant model after control or Abemaciclib treatment.

F-G. Quantifications of the proliferation potential of FVB mice BM-M2 macrophages cocultured with HP-5712 (F; n=3, respectively) or Balb/c mice BM-M1 macrophages cocultured with 4T1 (G; n=3, respectively) after control or Palbociclib treatment in the con-treatment model.

H. Fold changes of CD86 expressions on the surface of FVB mice BM-M2 macrophages cocultured with HP5712 at different ratios after control or Abemaciclib treatment in the con-treatment model (n=3, respectively).

I. Quantifications of TNF $\alpha$  expressions of FVB mice BM-M1 macrophages cocultured with HP5712 after control or Abemaciclib treatment in the con-treatment model (n=6, respectively).

Unpaired two-tailed t-tests (B-G, I), two-way ANOVA corrected for multiple comparisons (H). Error bars represent SD. \*p<0.05, \*\*p<0.01, \*\*\*p<0.001, \*\*\*\*p<0.0001.

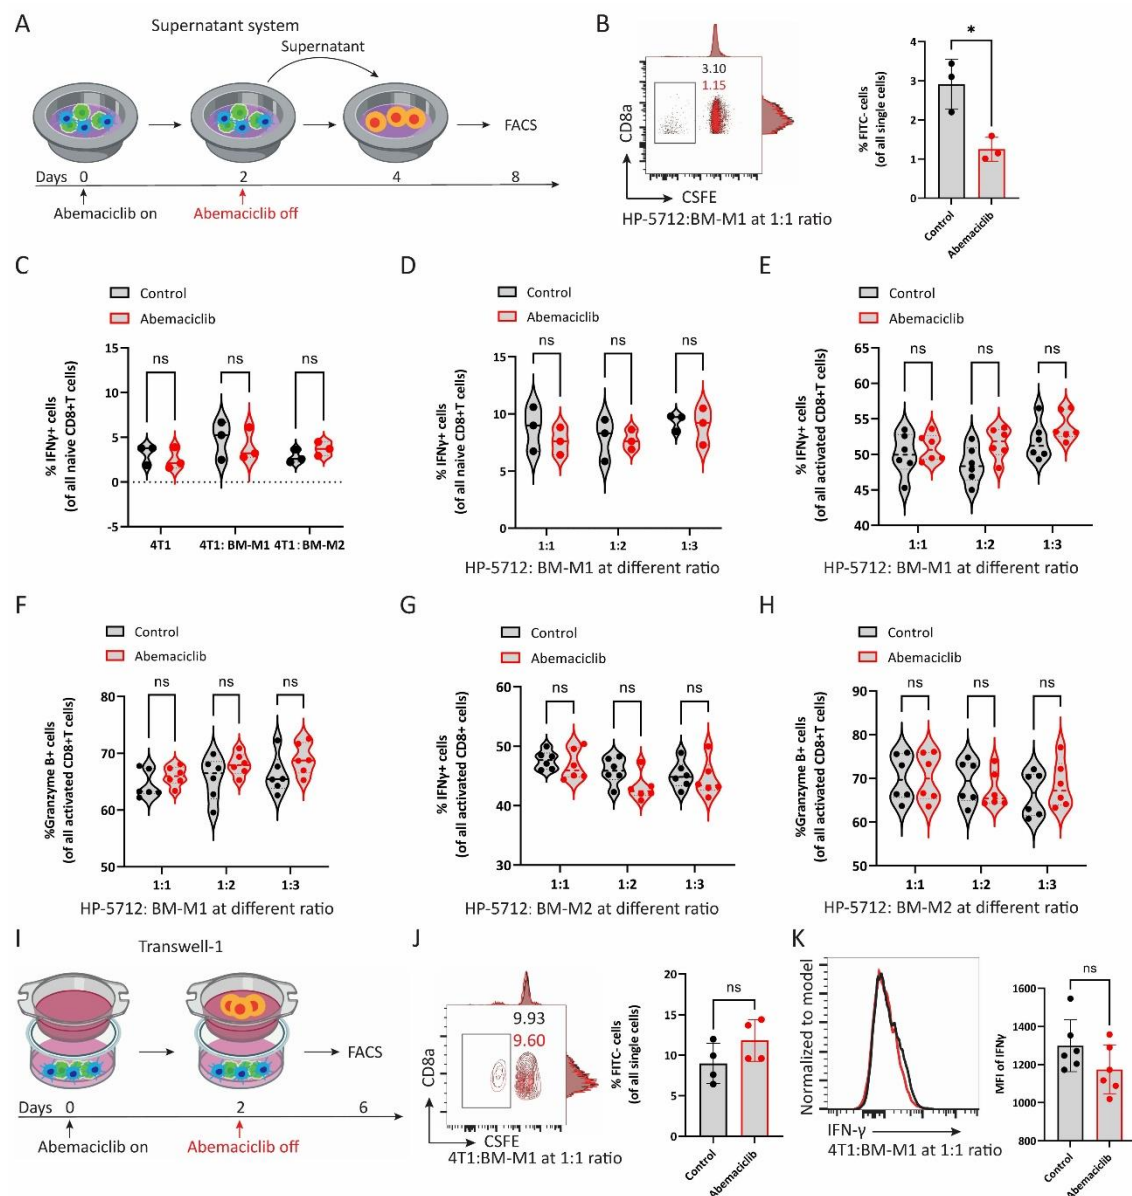

**Supplementary Figure 8. CDK4/6 inhibition-trained M1 tumor-associated macrophage supernatant fails to stimulate CD8<sup>+</sup> T cell antitumor immunity without cell-cell interactions.**

A. The supernatant model to detect CD8<sup>+</sup> T cell proliferation and activation.

B. Representative FACS plots and quantifications of the proliferation potential of Balb/c mice-derived naïve CD8<sup>+</sup> T cells in the supernatant model after control or Abemaciclib treatment (n=3, respectively).

C. Quantifications of IFN $\gamma$  expressions on the surface of FVB mice-derived naïve CD8<sup>+</sup> T cells in the supernatant model of HP5712 cocultured with FVB mice BM-M1 macrophages at different ratios after control or Abemaciclib treatment (n=3, respectively).

D. Quantifications of IFN $\gamma$  expressions on the surface of Balb/c mice-derived naïve CD8<sup>+</sup> T cells in the supernatant model of 4T1 alone, 4T1 cocultured with Balb/c mice BM-M1 or BM-M2 macrophages at a 1:1 ratio after control or Abemaciclib treatment (n=3, respectively).

E-F. Quantifications of IFN $\gamma$  (E; n=6, respectively) and granzyme B (F; n=6, respectively) expressions on the surface of FVB mice-derived activated CD8 $^{+}$  T cells in the supernatant model of HP5712 cocultured with FVB mice BM-M1 macrophages at different ratios after control or Abemaciclib treatment.

G-H. Quantifications of IFN $\gamma$  (G; n=6, respectively) and granzyme B (H; n=6, respectively) expressions on the surface of FVB mice-derived activated CD8 $^{+}$  T cells in the supernatant model of HP5712 cocultured with FVB mice BM-M2 macrophages at different ratios after control or Abemaciclib treatment.

I. The Transwell model to detect CD8 $^{+}$  T cell proliferation and activation.

J. Representative FACS plots and quantifications of the proliferation potential of Balb/c mice-derived naïve CD8 $^{+}$  T cells in the Transwell model after control or Abemaciclib treatment (n=3, respectively).

K. Representative FACS histograms and quantifications of IFN $\gamma$  expressions on the surface of Balb/c mice-derived activated CD8 $^{+}$  T cells in the supernatant model of 4T1 cocultured with Balb/c mice BM-M1 macrophages at a 1:1 ratio after control or Abemaciclib treatment.

Unpaired two-tailed t-tests (B, J, K), two-way ANOVA corrected for multiple comparisons (C-H). Error bars represent SD. ns  $p > 0.05$ , \* $p < 0.05$ .

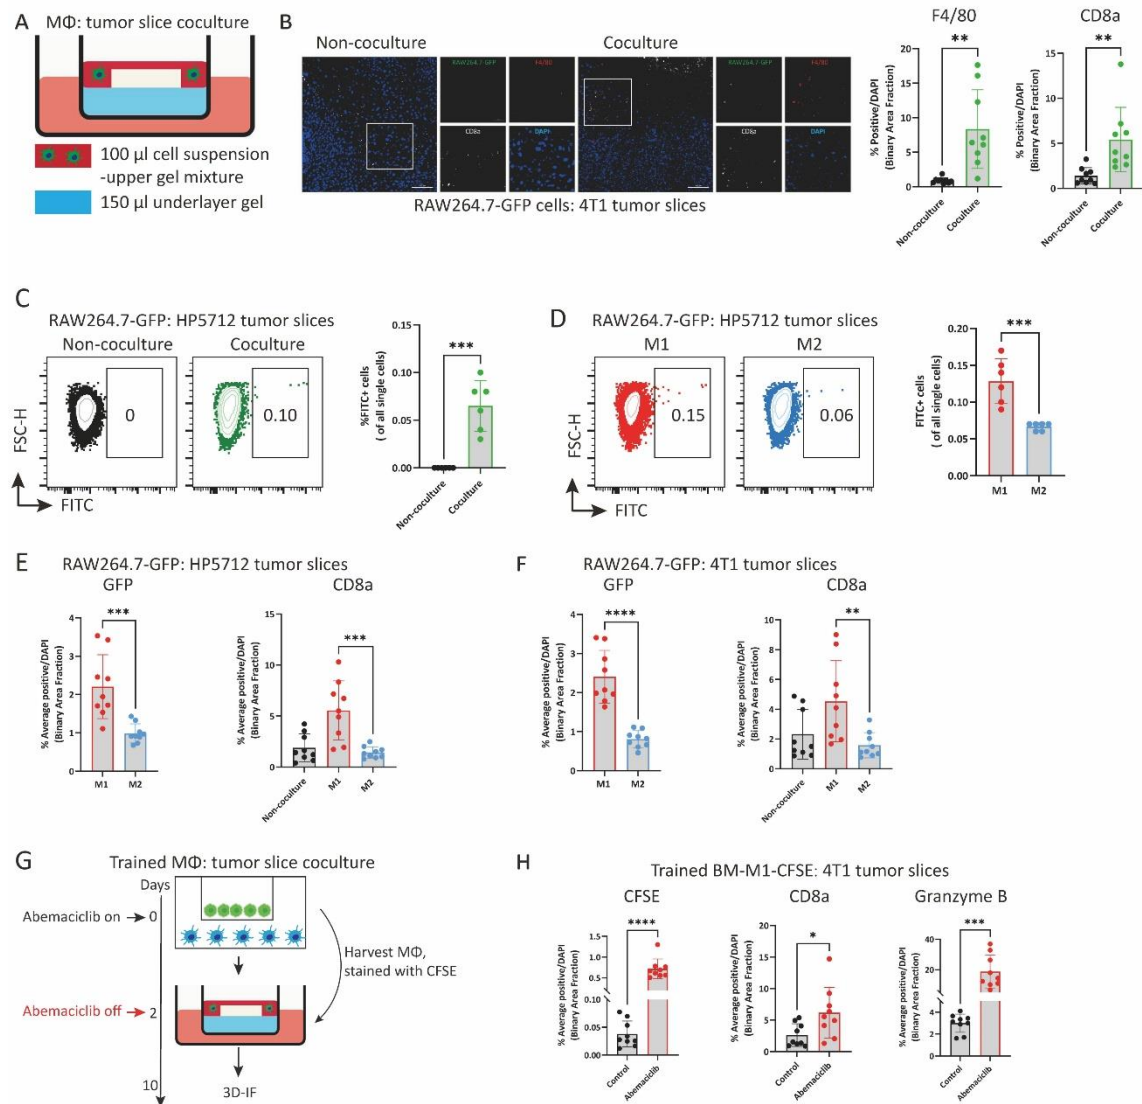

### Supplementary Figure 9. CDK4/6 trained M1 tumor-associated macrophages penetrate into tumor slices and remodel the tumor immune microenvironment.

A. Coculture model of macrophages and tumor slices.

B. Representative IF images and quantifications of penetrated RAW264.7-GFP (green) and F4/80 (red) and CD8a (white) expressions on the surfaces of Balb/c mice orthotopically injected with 4T1 tumor slices after 8 days of coculture (3 areas × 3 samples, respectively).

C. Representative FACS plots and quantifications of RAW264.7-GFP penetration capacity in FVB mice orthotopically injected with HP5712 tumor slices after 8 days of coculture (n=6, respectively).

D. Penetration capacity of different RAW264.7-GFP subpopulations in FVB mice orthotopically injected with HP5712 tumor slices after 8 days of coculture (n=6, respectively).

E-F. Quantification of penetration capacity of RAW264.7-GFP M1 or M2 macrophages and CD8a expressions in immunocompetent mice orthotopically injected with HP5712 (E; 3 areas × 3 samples, respectively) or 4T1 (F; 3 areas × 3 samples, respectively) tumor slices after 8 days of coculture.

G. Workflow to detect penetration capacity of Abemaciclib-trained immunocompetent mice BM-M1 in tumor slices and intratumoral immune cell repertoire changes after coculture.

H. Quantification of CFSE, CD3/CD8, and granzyme B expressions in Balb/c mice orthotopically injected with 4T1 tumor slices cocultured with control or Abemaciclib-trained BM-M1-CFSE (3 areas  $\times$  3 samples, respectively).

Unpaired two-tailed t-tests (B-F, H); one-way ANOVA corrected for multiple comparisons (E, F). Error bars represent SD. \* $p < 0.05$ , \*\* $p < 0.01$ , \*\*\* $p < 0.001$ , \*\*\*\* $p < 0.0001$ .

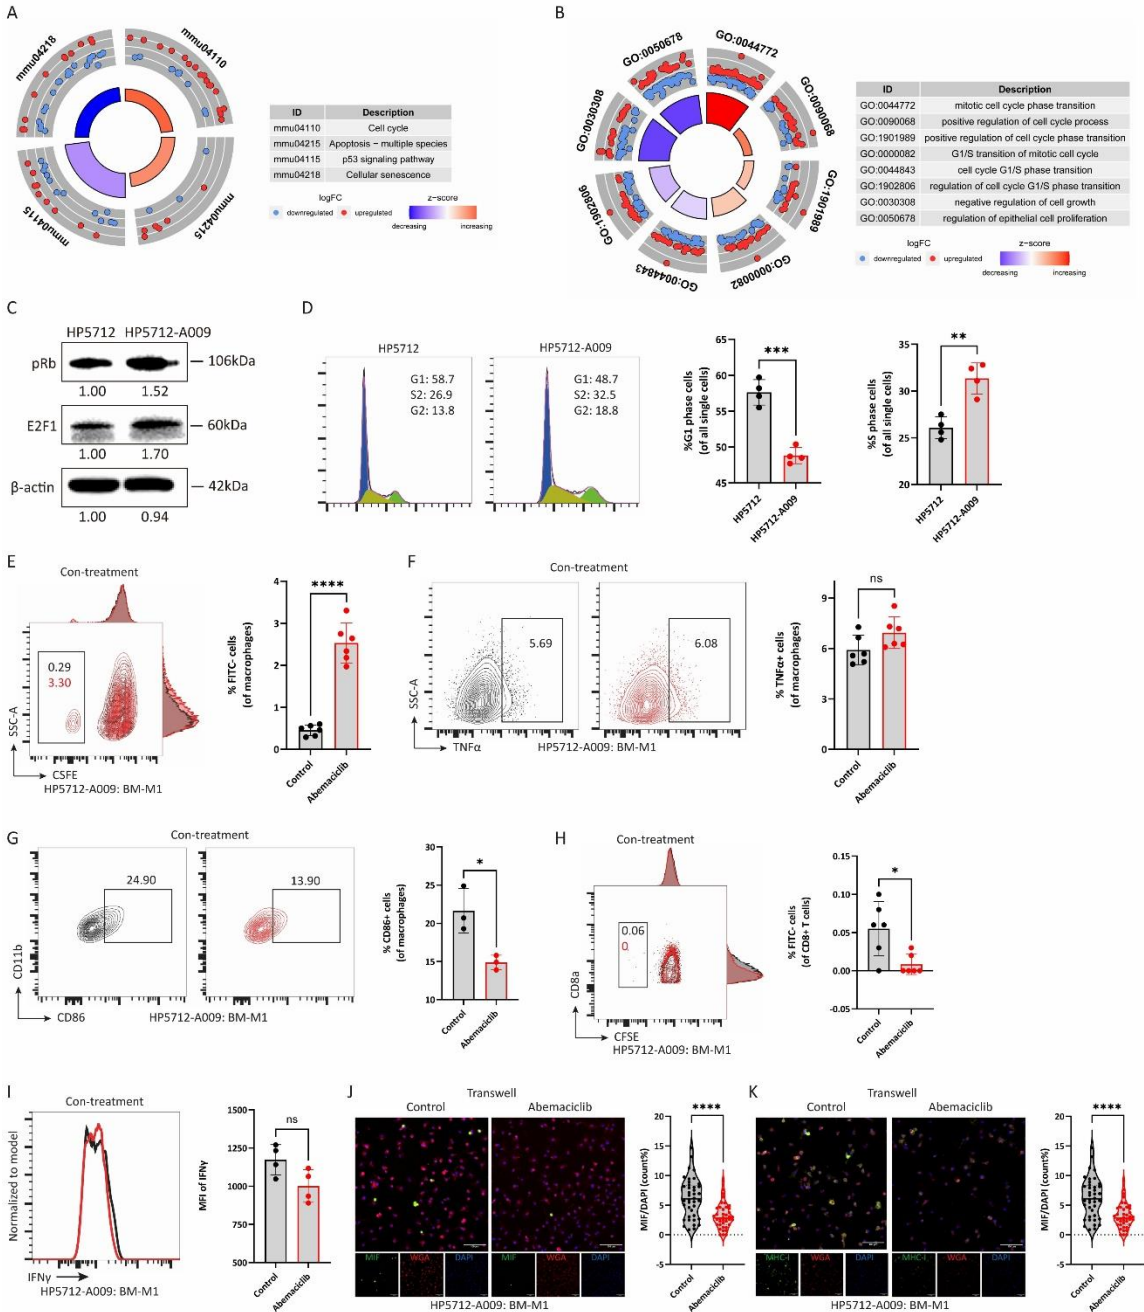

**Supplementary Figure 10. CDK4/6 inhibition fails to reprogram tumor-associated macrophages and trigger CD8+ T cell antitumor immunity in CDK4/6 resistant tumor cells.**

A-B. KEGG terms (A) and GO terms (B) of significantly upregulated and downregulated genes in HP5712-A009 cells compared to HP5712 cells during the log phase (n=3, respectively).



C. Representative immunoblots of pRb and E2F1 expressions in HP5712-A009 and HP5712 cells during the log phase.

D. Representative FACS cell cycle distribution and quantifications of G1 and S phase cell populations between HP5712-A009 and HP5712 during the log phase (n=4, respectively).

E-G. Representative FACS plots and quantifications of proliferation potential of FVB mice BM-M1 macrophages (E; n=6, respectively), TNF $\alpha$  expressions on the surface of FVB mice BM-M1 macrophages (F; n=6, respectively), and CD86 expressions on the surface of FVB mice BM-M2 macrophages (G; n=3, respectively) cocultured with HP5712-A009 cells after control or Abemaciclib treatment in the con-treatment model.

H. Representative FACS plots and quantifications of proliferation potential of FVB mice-derived naïve CD8<sup>+</sup> T cells in the coculture system of HP5712-A009: FVB mice BM-M1 macrophages at a 1:1 ratio after vehicle or Abemaciclib treatment (n=6, respectively).

I. Representative FACS histograms and quantifications of IFN $\gamma$  expressions on FVB mice-derived activated CD8<sup>+</sup> T cells in the coculture system of HP5712-A009: FVB mice BM-M1 macrophages at a 1:1 ratio after vehicle or Abemaciclib treatment (n=4, respectively).

J. Representative images and quantifications of MIF expression (green) in control- or Abemaciclib-treated FVB mice BM-M1 macrophage from HP5712-A009: BM-M1 in the Transwell model (10 areas  $\times$  4 samples, respectively); scale bar = 100  $\mu$ m.

K. Representative images and quantifications of MHC-I expression (green) in control- or Abemaciclib-treated FVB mice BM-M1 macrophages from HP5712-A009: BM-M1 in the Transwell model (10 areas  $\times$  4 samples, respectively); scale bar = 100  $\mu$ m.

Unpaired two-tailed t-tests (D-K). Error bars represent SD. ns  $p > 0.05$ , \* $p < 0.05$ , \*\* $p < 0.01$ , \*\*\* $p < 0.001$ , \*\*\*\* $p < 0.0001$ .

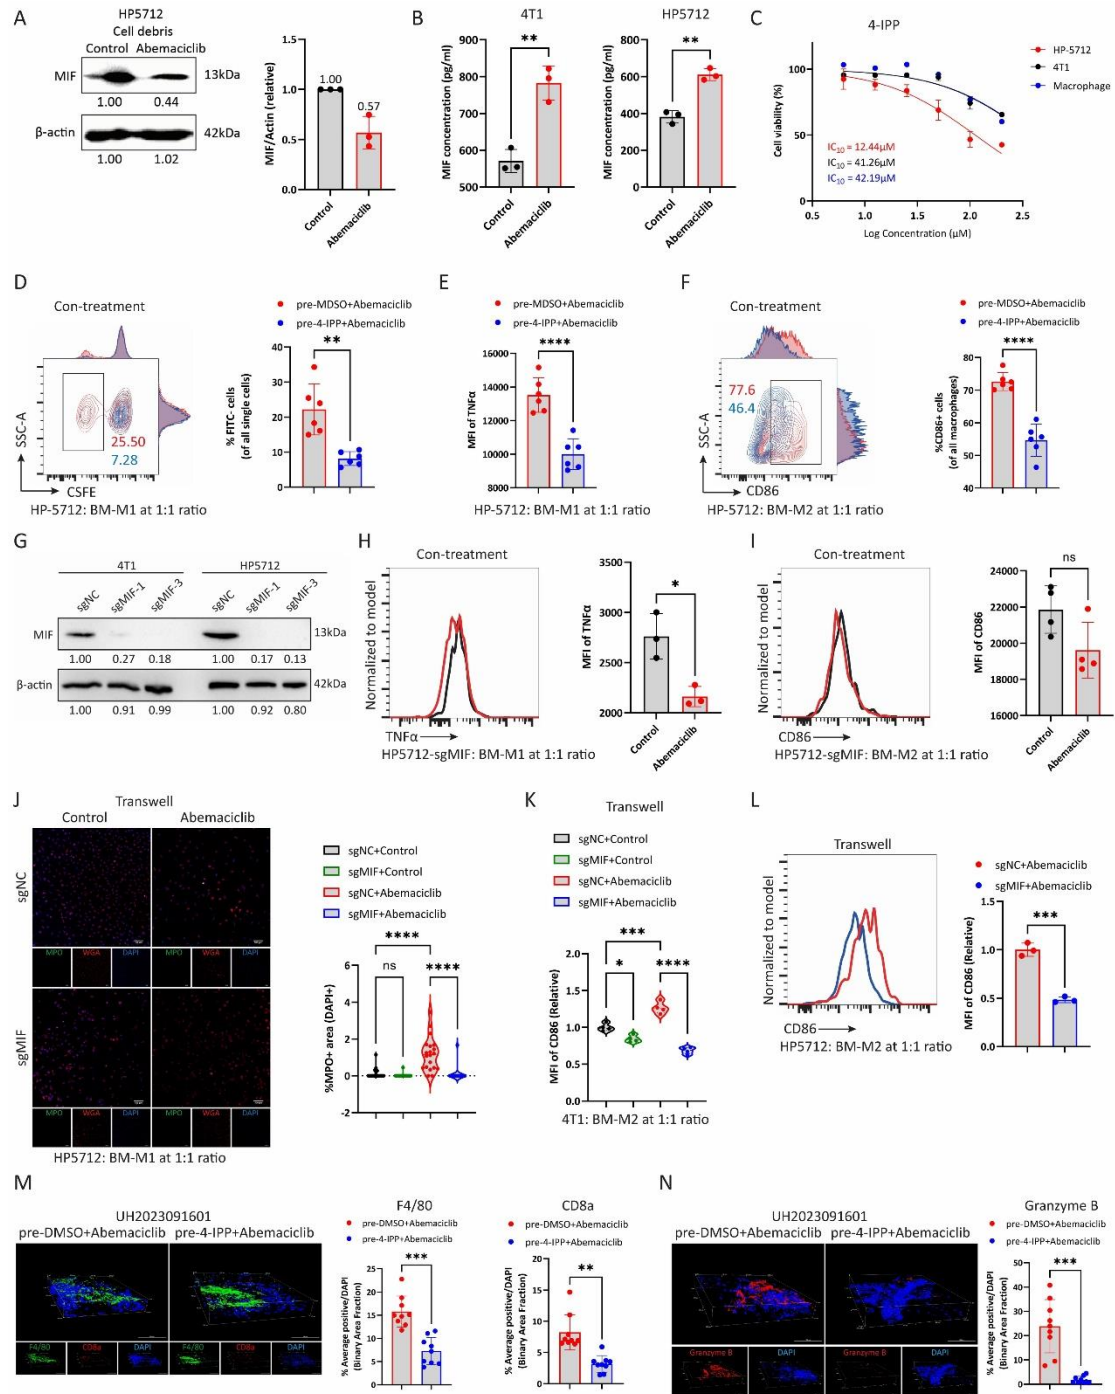

**Supplementary Figure 11. Tumor cell-secreted MIF is important to CDK4/6 inhibition reprogramming tumor-associated macrophages.**

A. Representative immunoblots and fold changes of MIF expressions in HP5712 cell debris after control or Abemaciclib treatment (n=3, respectively).

B. Secreted MIF concentration in the supernatant from 4T1 and HP5712 cells after control or Abemaciclib treatment (n=3, respectively).

C. IC<sub>10</sub> of 4-IPP on HP5712, 4T1, and FVB mice BM-M1 macrophages (n=3, respectively).

D. Representative FACS plots and quantifications of the proliferation potential of FVB mice BM-M1 macrophages cocultured with HP5712 after pre-DMSO plus Abemaciclib or pre-4-IPP plus Abemaciclib treatment in the con-treatment model (n=6, respectively).

E. Quantifications of TNF $\alpha$  expressions on the surface of FVB mice BM-M1 macrophages cocultured with HP5712 after pre-DMSO plus Abemaciclib or pre-4-IPP plus Abemaciclib treatment in the con-treatment model (n=6, respectively).

F. Representative FACS plots and quantifications of CD86 expressions on the surface of FVB mice BM-M1 macrophages cocultured with HP5712 after pre-DMSO plus Abemaciclib or pre-4-IPP plus Abemaciclib treatment in the con-treatment model (n=6, respectively).

G. Knockout efficacy of two different sgMIFs on MIF expression in 4T1 (left) and HP5712 (right) cell lines.

H. Representative FACS histograms and quantifications of TNF $\alpha$  expressions on the surface of FVB mice BM-M1 macrophages cocultured with HP5712-sgMIF after control or Abemaciclib treatment in the con-treatment model (n=3, respectively).

I. Representative FACS histograms and quantifications of CD86 expressions on the surface of FVB mice BM-M2 macrophages cocultured with HP5712-sgMIF after control or Abemaciclib treatment in the con-treatment model (n=4, respectively).

J. Representative images and quantifications of MPO expressions (green) in FVB mice BM-M1 macrophages cocultured with HP5712-sgNC or HP5712-sgMIF after control or Abemaciclib treatment in the Transwell model (5 areas  $\times$  4 samples, respectively); scale bar=100 $\mu$ m.

K. Quantifications of CD86 expressions on the surface of Balb/c mice BM-M2 macrophages cocultured with 4T1-sgNC or 4T1-sgMIF after control or Abemaciclib treatment in the Transwell model (n=4, respectively).

L. Representative FACS histograms and quantifications of CD86 expressions on the surface of FVB mice BM-M2 macrophages cocultured with HP5712-sgNC or HP5712-sgMIF after Abemaciclib treatment in the Transwell model (n=3, respectively).

M-N. Representative 3D-IF images and quantifications of F4/80 (green) and CD8a (red) (M) and granzyme B (red) (N) expressions in human Luminal breast tumor slices after pre-DMSO plus Abemaciclib or pre-4-IPP plus Abemaciclib treatment (3 areas  $\times$  3 samples, respectively); scale bar=100 $\mu$ m.

Unpaired two-tailed t-tests (B, D-F, H, I, L-N); one-way ANOVA corrected for multiple comparisons (J, K). Error bars represent SD. ns  $p > 0.05$ , \* $p < 0.05$ , \*\* $p < 0.01$ , \*\*\* $p < 0.001$ , \*\*\*\* $p < 0.0001$ .

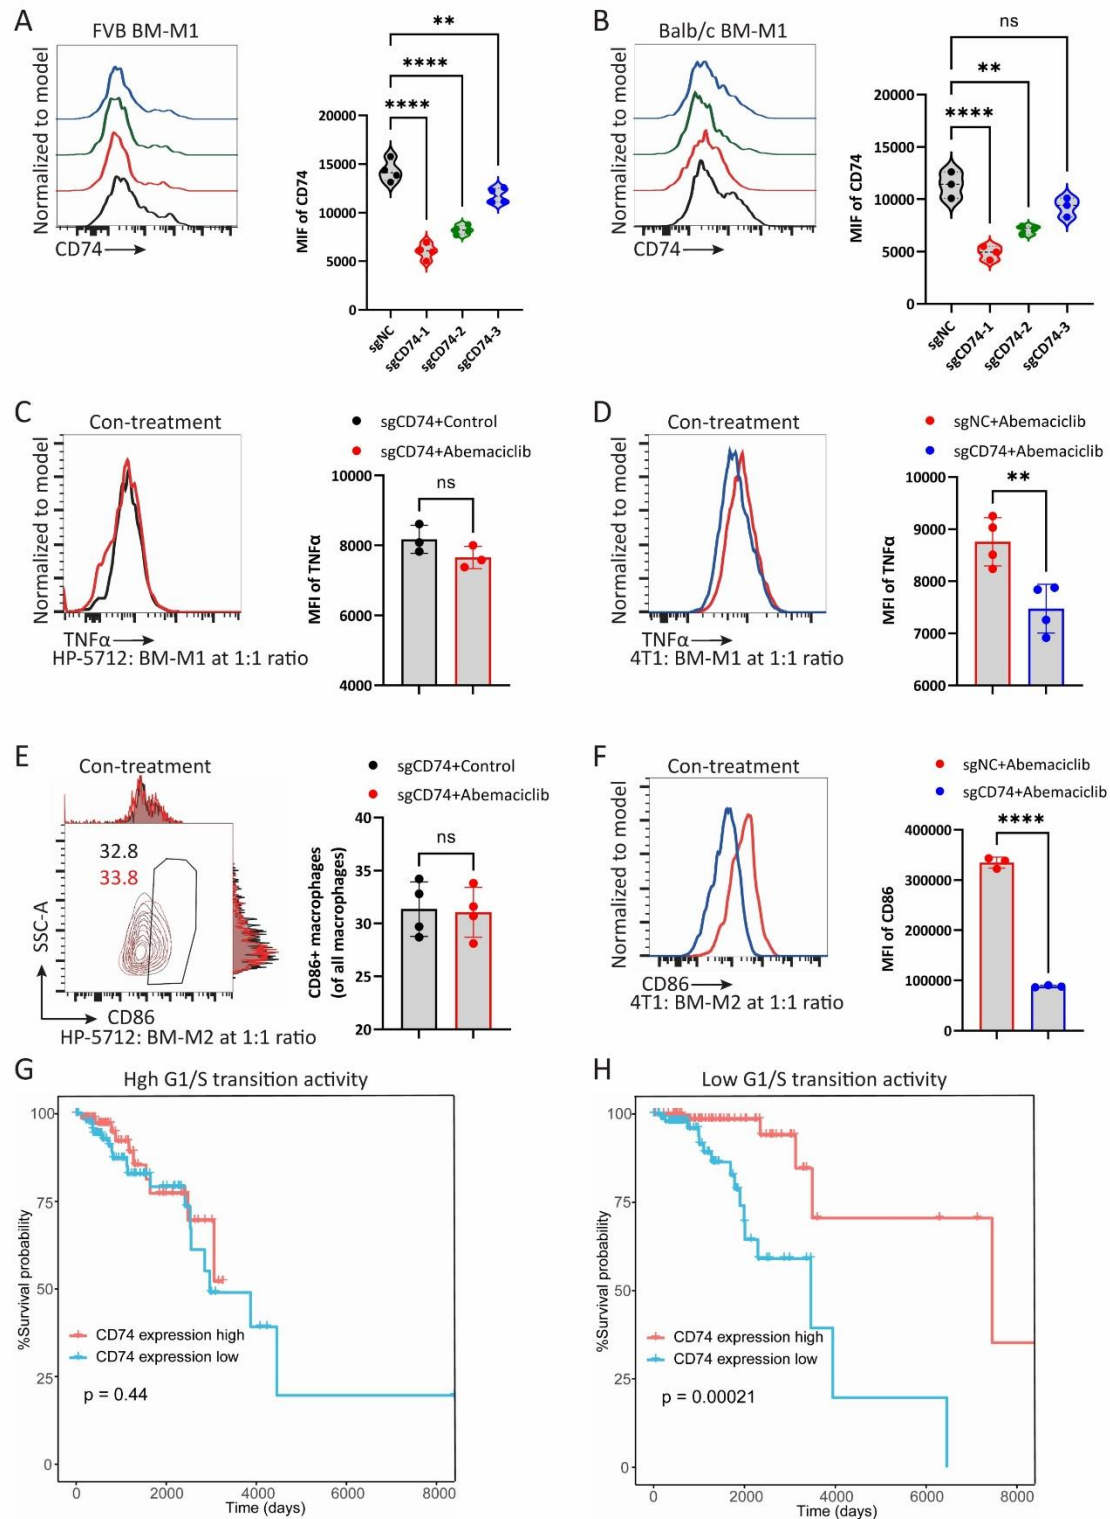

**Supplementary Figure 12. CD74 deletion on macrophages blocks the functional reprogramming of tumor-associated macrophages by CDK4/6 inhibition**

A-B. Knockout efficacy of three different sgCD74s on CD74 expressions in FVB (A; n=4, respectively) and Balb/c (B; n=3, respectively) mice BM-M1 macrophages.

C. Representative FACS histograms and quantifications of TNF $\alpha$  expressions on the surface of FVB mice BM-M1-sgCD74 macrophages cocultured with HP5712 after control or Abemaciclib treatment in the con-treatment model (n=3, respectively).

D. Representative FACS histograms and quantifications of TNF $\alpha$  expressions on the surface of Balb/c mice BM-M1-sgNC or sgCD74 macrophages cocultured with 4T1 after Abemaciclib treatment in the con-treatment model (n=4, respectively).

E. Representative FACS plots and quantifications of CD86 expressions on the surface of FVB mice BM-M2-sgCD74 macrophages cocultured with HP5712 after control or Abemaciclib treatment in the con-treatment model (n=4, respectively).

F. Representative FACS histograms and quantifications of CD86 expressions on the surface of Balb/c mice BM-M2-sgNC or sgCD74 macrophages cocultured with 4T1 after Abemaciclib treatment in the con-treatment model (n=3, respectively).

G-H. TCGA analysis of survival benefits between CD74-high and CD74-low breast cancer patients in high G1/S transition activity cohort (G) and low G1/S transition activity cohort (H), respectively.

Unpaired two-tailed t-tests (C-F); one-way ANOVA corrected for multiple comparisons (A-B). Error bars represent SD. ns  $p > 0.05$ , \*\* $p < 0.01$ , \*\*\*\* $p < 0.0001$ .

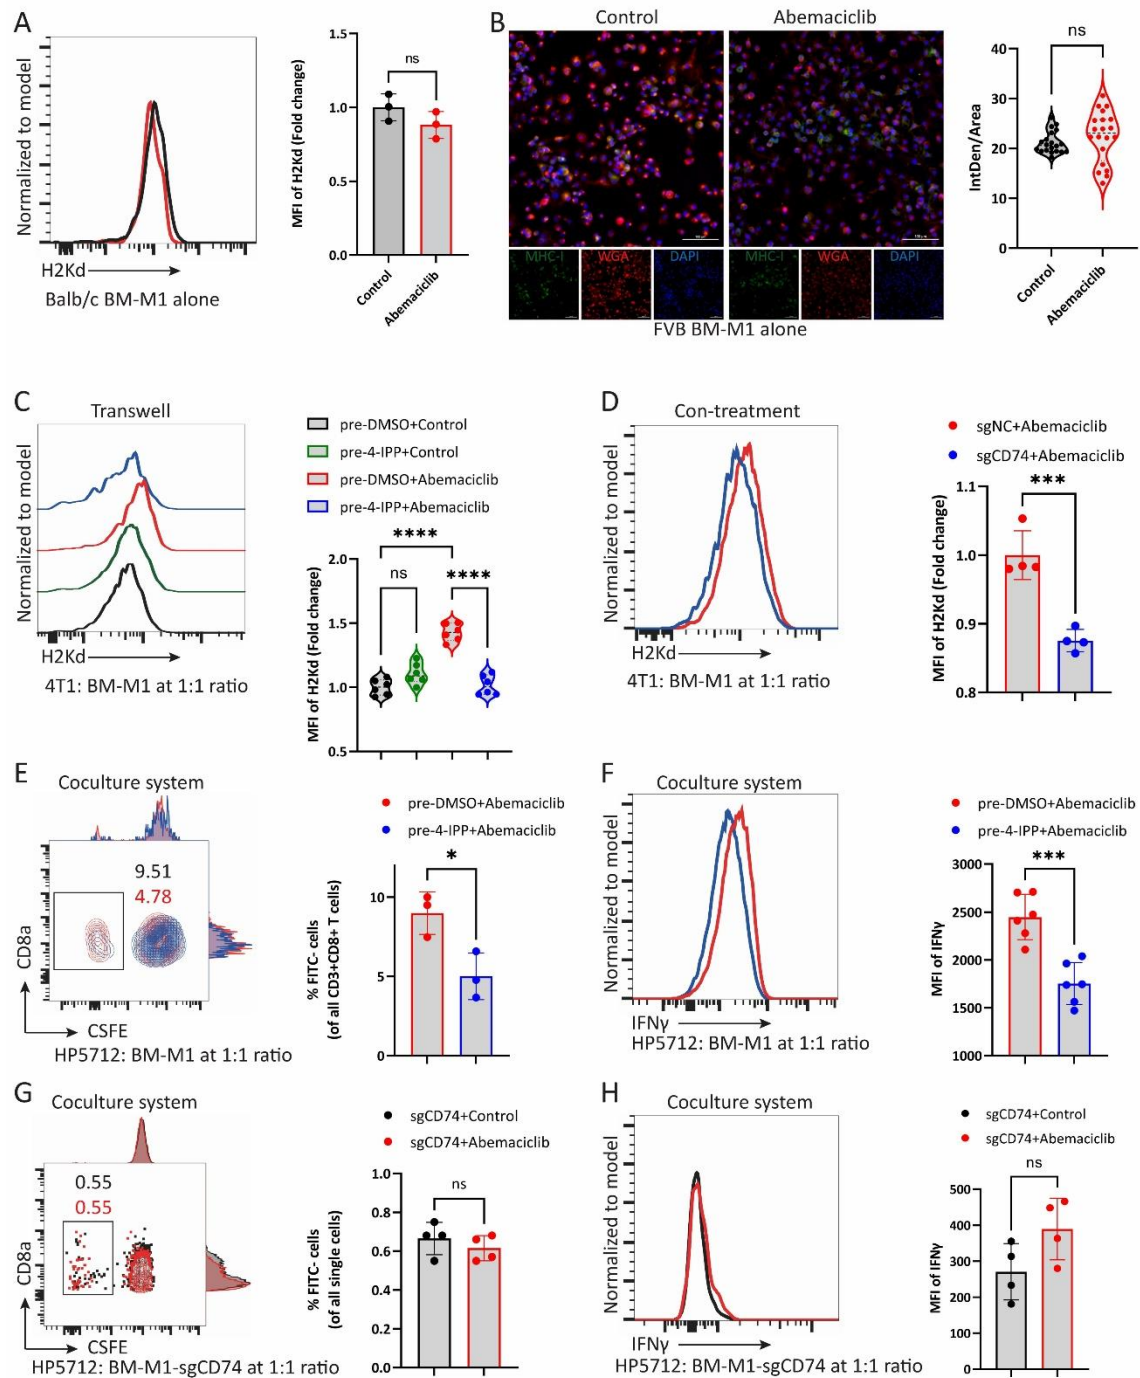

### Supplementary Figure 13. CDK4/6 inhibition-induced MIF dominates MHC-I antigen presentation machinery on M1 tumor-associated macrophages

A. Representative FACS histograms and quantifications of H2Kd expressions on Balb/c mice BM-M1 macrophages after control or Abemaciclib treatment (n=3, respectively).

B. Representative images and quantifications of MHC-I expression (green) on FVB mice BM-M1 macrophages after control or Abemaciclib treatment (5 areas  $\times$  4 samples, respectively); scale bar=100 $\mu$ m.

C. Representative FACS histograms and quantifications of H2Kd expressions on Balb/c mice BM-M1 macrophages co-cultured with 4T1 after pre-DMSO or 4-IPP plus control or Abemaciclib treatment in the Transwell model (n=6, respectively).



D. Representative FACS histograms and quantifications of H2Kd expressions on Balb/c mice BM-M1-sgNC or sgCD74 macrophages co-cultured with 4T1 after Abemaciclib treatment in the co-treatment model (n=4, respectively).

E. Representative FACS plots and quantifications of the proliferation potential of FVB mouse-derived naïve CD8<sup>+</sup> T cells in the co-culture system of HP5712: FVB mice BM-M1 macrophages at a 1:1 ratio after pre-DMSO plus Abemaciclib or 4-IPP plus Abemaciclib treatment (n=3, respectively).

F. Quantifications of IFN $\gamma$  expressions on FVB mouse-derived activated CD8<sup>+</sup> T cells in the co-culture system of HP5712: FVB mice BM-M1 macrophages at a 1:1 ratio after pre-DMSO plus Abemaciclib or 4-IPP plus Abemaciclib treatment (n=6, respectively).

G. Representative FACS plots and quantifications of the proliferation potential of FVB mouse-derived naïve CD8<sup>+</sup> T cells in the co-culture system of HP5712: FVB mice BM-M1-sgCD74 macrophages at a 1:1 ratio after control or Abemaciclib treatment (n=4, respectively).

H. Representative FACS histograms and quantifications of IFN $\gamma$  expressions on FVB mouse-derived activated CD8<sup>+</sup> T cells in the co-culture system of HP5712: FVB mice BM-M1-sgCD74 macrophages at a 1:1 ratio after control or Abemaciclib treatment (n=4, respectively).

Unpaired two-tailed t-tests (A, B, D-H); one-way ANOVA corrected for multiple comparisons (C). Error bars, SD. ns  $p > 0.05$ , \* $p < 0.05$ , \*\* $p < 0.01$ , \*\*\* $p < 0.001$ , \*\*\*\* $p < 0.0001$ .

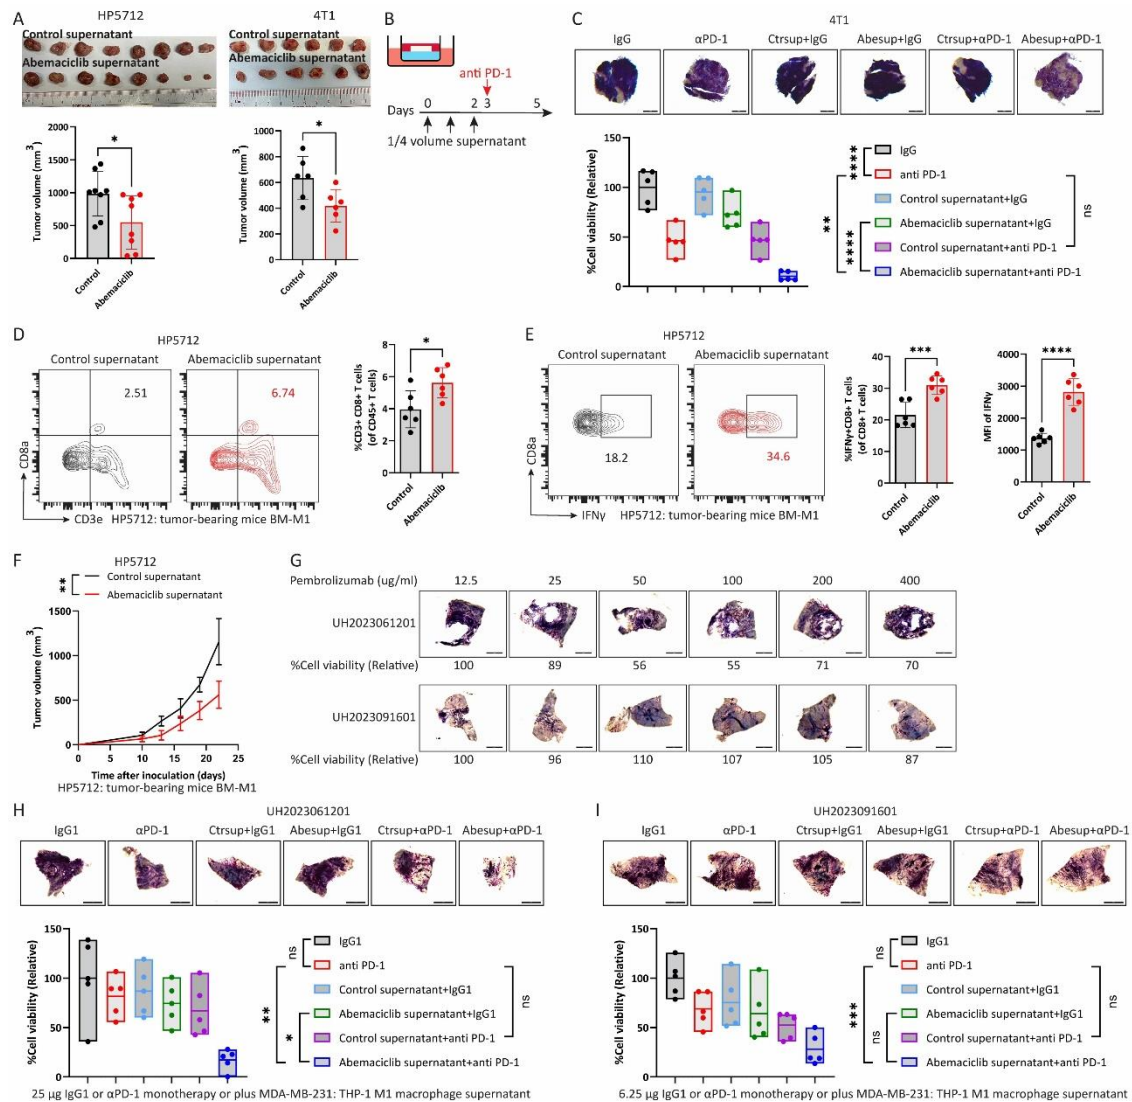

### Supplementary Figure 14. CDK4/6 inhibition-trained M1 tumor-associated macrophage supernatant therapy augments tumor response of PD-1 ICB therapy ex vivo.

A. Representative tumor images and tumor volume comparison of FVB mice orthotopically injected with HP5712 cells (left; n=8, respectively) and Balb/c mice orthotopically injected with 4T1 cells (right; n=6, respectively) after 7 days of control supernatant or Abemaciclib supernatant therapy.

B. Workflow of CDK4/6 inhibition-trained M1 tumor-associated macrophage supernatant therapy combined with PD-1 ICB therapy ex vivo.

C. Representative MTT images and quantification of cell viability in Balb/c mice orthotopically injected with 4T1 tumor slices after IgG or  $\alpha$ PD-1 alone or combined with control supernatant or Abemaciclib supernatant therapy (n=6, respectively); scale bar=2mm.

D. Representative FACS plot and quantifications of intratumoral CD8<sup>+</sup> T cells from FVB mice orthotopically injected with HP5712 cells after control supernatant or Abemaciclib supernatant therapy (n=6, respectively).

E. Representative FACS plot and quantifications of IFN $\gamma$  expressions on the surface of intratumoral CD8<sup>+</sup> T cells from FVB mice orthotopically injected with HP5712 cells after control supernatant or Abemaciclib supernatant therapy (n=6, respectively).

F. Tumor volume changes of FVB mice orthotopically injected with HP5712 cells after 7 days of control supernatant or Abemaciclib supernatant therapy (n=6, respectively); D-F, the BM-M1 macrophages were derived from FVB mice orthotopically injected with HP5712 cells at day-7.

G. Tumor response of human TNBC and Luminal breast tumor slices to gradient concentrations of Pembrolizumab; scale bar=2mm.

H. Representative MTT images and quantification of cell viability in human TNBC slices after 25 µg/ml IgG1 or Pembrolizumab alone or combined with control supernatant or Abemaciclib supernatant therapy (n=5, respectively); scale bar=2mm.

I. Representative MTT images and quantification of cell viability in human Luminal breast tumor slices after 6.25 µg/ml IgG1 or Pembrolizumab alone or combined with control supernatant or Abemaciclib supernatant therapy (n=5, respectively); H-I, the supernatant was collected from MDA-MB-231 cells cocultured with THP1 M1 macrophages at a 1:1 ratio after control or Abemaciclib treatment; scale bar=2mm.

Unpaired two-tailed t-tests (A, D-F); one-way ANOVA corrected for multiple comparisons (C, H-I). Error bars, SD. ns  $p > 0.05$ , \* $p < 0.05$ , \*\* $p < 0.01$ , \*\*\* $p < 0.001$ , \*\*\*\* $p < 0.0001$ .
